# Supplementary material for: RNA Editing Alters miRNA Function in Chronic Lymphocytic Leukemia
Source: MDPI journal article supplement (doi:10.3390/cancers12051159), 2020-05-05
Supplement: s1 [file s1]

**A**

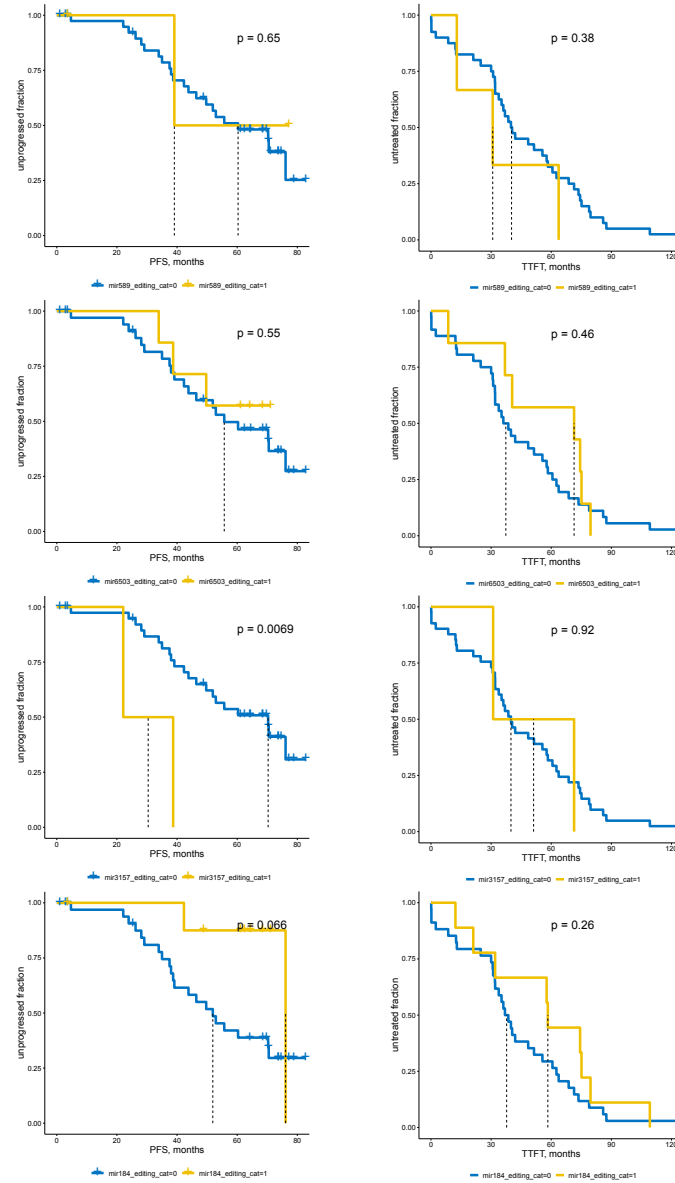

**B**

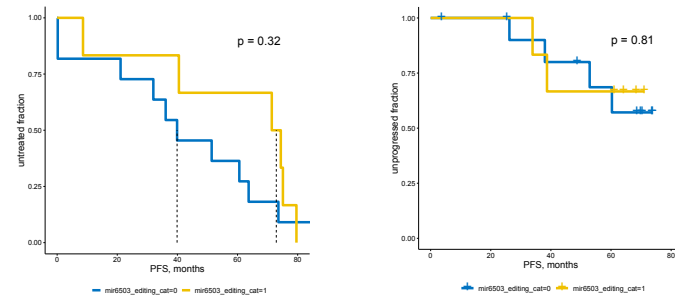

**Figure S1. Kaplan-Meier plots for progression free survival (PFS) and time to first treatment (TTT) for individual editing events in CLL**
